# Supplementary material for: The High-Pressure Phase Transition in Jamesonite: A Single-Crystal Synchrotron X-ray Diffraction Study
Source: MDPI journal article supplement (doi:10.3390/cryst13081258), 2023-08-15
Supplement: s1 [file s1]

**Table S1.** Atomic coordinates and Ueq for jamesonite  $\alpha$  and  $\beta$  at different pressures.  $P$  values are given in Table 1. P0 values come from the refinement of jamesonite reported in [14].

| Sites | Phase    | P  | x         | y         | z         | U <sub>eq</sub> |
|-------|----------|----|-----------|-----------|-----------|-----------------|
| Pb1   | $\alpha$ | P0 | 0.4415(1) | 0.2398(1) | 0.5747(1) | 0.0349(1)       |
|       |          | P1 | 0.4490(1) | 0.2385(1) | 0.5765(1) | 0.0210(5)       |
|       |          | P2 | 0.4673(1) | 0.2349(1) | 0.5790(1) | 0.0178(4)       |
|       |          | P3 | 0.4760(1) | 0.2329(1) | 0.5804(1) | 0.0147(2)       |
|       | $\beta$  | P4 | 0.5       | 0.7316(1) | 0.5820(1) | 0.0180(1)       |
|       |          | P5 | 0.5       | 0.7313(4) | 0.5832(2) | 0.0226(3)       |
|       |          | P6 | 0.5       | 0.7308(6) | 0.5838(3) | 0.0232(4)       |
|       |          | P7 | 0.5       | 0.7303(6) | 0.5845(3) | 0.0234(4)       |
| Pb2   | $\alpha$ | P0 | 0.4638(1) | 0.1406(1) | 0.8177(1) | 0.0376(1)       |
|       |          | P1 | 0.4673(1) | 0.1416(1) | 0.8208(1) | 0.0243(4)       |
|       |          | P2 | 0.4802(1) | 0.1425(1) | 0.8253(1) | 0.0198(4)       |
|       |          | P3 | 0.4857(1) | 0.1430(1) | 0.8278(1) | 0.0162(2)       |
|       | $\beta$  | P4 | 0.5       | 0.6404(1) | 0.8332(1) | 0.0191(1)       |
|       |          | P5 | 0.5       | 0.6395(4) | 0.8355(2) | 0.0235(3)       |
|       |          | P6 | 0.5       | 0.6394(6) | 0.8365(3) | 0.0238(4)       |
|       |          | P7 | 0.5       | 0.6394(6) | 0.8374(3) | 0.0235(4)       |
| Sb1   | $\alpha$ | P0 | 0.8819(1) | 0.0488(1) | 0.6042(1) | 0.0325(1)       |
|       |          | P1 | 0.8867(2) | 0.0461(1) | 0.6032(5) | 0.0216(9)       |
|       |          | P2 | 0.9101(1) | 0.0411(1) | 0.6035(4) | 0.0164(7)       |
|       |          | P3 | 0.9240(2) | 0.0388(1) | 0.6042(4) | 0.0135(4)       |
|       | $\beta$  | P4 | 0         | 0.6553(1) | 0.3682(3) | 0.0182(2)       |
|       |          | P5 | 0         | 0.6548(8) | 0.3688(5) | 0.0224(4)       |
|       |          | P6 | 0         | 0.6545(1) | 0.3692(7) | 0.0234(7)       |
|       |          | P7 | 0         | 0.6539(1) | 0.3698(6) | 0.0236(7)       |
| Sb2   | $\alpha$ | P0 | 0.9109(1) | 0.9368(1) | 0.8198(1) | 0.0315(1)       |
|       |          | P1 | 0.9127(2) | 0.9348(1) | 0.8189(5) | 0.0210(8)       |
|       |          | P2 | 0.9304(1) | 0.9292(1) | 0.8206(4) | 0.0175(7)       |
|       |          | P3 | 0.9415(2) | 0.9261(1) | 0.8218(4) | 0.0140(4)       |
|       | $\beta$  | P4 | 0         | 0.5362(5) | 0.6068(3) | 0.0195(3)       |
|       |          | P5 | 0         | 0.5346(8) | 0.6075(5) | 0.0228(4)       |
|       |          | P6 | 0         | 0.5334(1) | 0.6079(7) | 0.0220(6)       |
|       |          | P7 | 0         | 0.5323(1) | 0.6082(7) | 0.0226(6)       |
| Sb3   | $\alpha$ | P0 | 0.8814(1) | 0.1591(1) | 0.3610(1) | 0.0373(1)       |
|       |          | P1 | 0.8928(2) | 0.1577(1) | 0.3694(1) | 0.0229(1)       |
|       |          | P2 | 0.9232(1) | 0.1560(1) | 0.3683(1) | 0.0176(8)       |

|         |          |    |           |           |           |           |
|---------|----------|----|-----------|-----------|-----------|-----------|
| $\beta$ | $\beta$  | P3 | 0.9373(2) | 0.1555(1) | 0.3683(1) | 0.0149(4) |
|         |          | P4 | 0.        | 0.4193(1) | 0.8236(1) | 0.0181(3) |
|         |          | P5 | 0         | 0.4160(8) | 0.8236(5) | 0.0220(5) |
|         |          | P6 | 0         | 0.4144(1) | 0.8237(7) | 0.0215(7) |
|         |          | P7 | 0         | 0.4127(1) | 0.8238(7) | 0.0212(6) |
| Fe      | $\alpha$ | P0 | 0.5       | 0         | 0         | 0.036(1)  |
|         |          | P1 | 0.5       | 0         | 0         | 0.020(2)  |
|         |          | P2 | 0.5       | 0         | 0         | 0.015(2)  |
|         |          | P3 | 0.5       | 0         | 0         | 0.012(1)  |
|         | $\beta$  | P4 | 0.5       | 0         | 0         | 0.014(1)  |
|         |          | P5 | 0.5       | 0         | 0         | 0.018(1)  |
|         |          | P6 | 0.5       | 0         | 0         | 0.018(1)  |
|         |          | P7 | 0.5       | 0         | 0         | 0.018(1)  |
| S1      | $\alpha$ | P0 | 0.4548(5) | 0.1021(1) | 0.4970(1) | 0.032(1)  |
|         |          | P1 | 0.4587(5) | 0.1001(4) | 0.4954(2) | 0.018(1)  |
|         |          | P2 | 0.4739(5) | 0.0975(3) | 0.4934(1) | 0.017(1)  |
|         |          | P3 | 0.4797(6) | 0.0969(2) | 0.4927(1) | 0.011(1)  |
|         | $\beta$  | P4 | 0.5       | 0.7063(2) | 0.2698(1) | 0.014(1)  |
|         |          | P5 | 0.5       | 0.7072(2) | 0.2699(1) | 0.020(1)  |
|         |          | P6 | 0.5       | 0.7072(4) | 0.2701(2) | 0.022(2)  |
|         |          | P7 | 0.5       | 0.7075(4) | 0.2699(2) | 0.020(2)  |
| S2      | $\alpha$ | P0 | 0.9492(1) | 0.1591(1) | 0.6826(1) | 0.029(1)  |
|         |          | P1 | 0.9554(5) | 0.1583(3) | 0.6835(1) | 0.015(3)  |
|         |          | P2 | 0.9725(4) | 0.1557(3) | 0.6849(1) | 0.014(2)  |
|         |          | P3 | 0.9800(6) | 0.1541(2) | 0.6857(2) | 0.012(1)  |
|         | $\beta$  | P4 | 0         | 0.5339(2) | 0.9102(1) | 0.018(1)  |
|         |          | P5 | 0         | 0.5320(2) | 0.9114(1) | 0.020(1)  |
|         |          | P6 | 0         | 0.5321(4) | 0.9111(2) | 0.021(2)  |
|         |          | P7 | 0         | 0.5311(4) | 0.9106(2) | 0.021(2)  |
| S3      | $\alpha$ | P0 | 0.9767(1) | 0.0437(1) | 0.9042(1) | 0.026(1)  |
|         |          | P1 | 0.9800(5) | 0.0431(3) | 0.9042(1) | 0.019(3)  |
|         |          | P2 | 0.9896(4) | 0.0419(3) | 0.9042(1) | 0.011(2)  |
|         |          | P3 | 0.9925(6) | 0.0405(2) | 0.9043(1) | 0.012(1)  |
|         | $\beta$  | P4 | 0         | 0.6529(2) | 0.6893(1) | 0.017(1)  |
|         |          | P5 | 0         | 0.6527(3) | 0.6906(2) | 0.022(1)  |
|         |          | P6 | 0         | 0.6524(4) | 0.6910(2) | 0.025(2)  |
|         |          | P7 | 0         | 0.6519(4) | 0.6916(2) | 0.023(2)  |
| S4      |          | P0 | 0.9301(1) | 0.2691(1) | 0.4479(1) | 0.029(1)  |

|    |          |    |           |            |           |          |
|----|----------|----|-----------|------------|-----------|----------|
|    | $\beta$  | P1 | 0.9402(5) | 0.2697(3)  | 0.4476(1) | 0.019(3) |
|    |          | P2 | 0.9638(4) | 0.2705(3)  | 0.447(1)  | 0.016(2) |
|    |          | P3 | 0.9742(6) | 0.2704(3)  | 0.4475(2) | 0.015(1) |
|    |          | P4 | 0.5       | 0.5959(2)  | 0.4942(1) | 0.016(1) |
|    |          | P5 | 0.5       | 0.5951(2)  | 0.4943(1) | 0.019(1) |
|    |          | P6 | 0.5       | 0.5945(4)  | 0.4939(2) | 0.021(2) |
|    |          | P7 | 0.5       | 0.5942(4)  | 0.4933(2) | 0.023(2) |
| S5 | $\alpha$ | P0 | 0.4690(1) | 0.0038(1)  | 0.7141(1) | 0.030(1) |
|    |          | P1 | 0.4757(5) | 0.0022(4)  | 0.7149(2) | 0.020(3) |
|    |          | P2 | 0.4828(4) | -0.0003(3) | 0.7168(1) | 0.013(2) |
|    |          | P3 | 0.4853(6) | -0.0017(2) | 0.7180(1) | 0.013(1) |
|    | $\beta$  | P4 | 0.5       | 0.3889(2)  | 0.9343(1) | 0.016(1) |
|    |          | P5 | 0.5       | 0.3888(3)  | 0.9363(1) | 0.021(1) |
|    |          | P6 | 0.5       | 0.3881(4)  | 0.9372(2) | 0.020(2) |
|    |          | P7 | 0.5       | 0.3873(4)  | 0.9382(2) | 0.024(2) |
| S6 | $\alpha$ | P0 | 0.4230(1) | 0.2964(1)  | 0.7757(1) | 0.034(1) |
|    |          | P1 | 0.4305(5) | 0.2970(4)  | 0.7739(2) | 0.019(3) |
|    |          | P2 | 0.4521(4) | 0.2965(3)  | 0.7710(1) | 0.018(2) |
|    |          | P3 | 0.4621(6) | 0.2963(2)  | 0.7690(1) | 0.014(1) |
|    | $\beta$  | P4 | 0         | 0.7721(2)  | 0.4483(1) | 0.017(1) |
|    |          | P5 | 0         | 0.7728(3)  | 0.4492(2) | 0.021(1) |
|    |          | P6 | 0         | 0.7729(4)  | 0.4498(2) | 0.023(2) |
|    |          | P7 | 0         | 0.7728(4)  | 0.4503(2) | 0.024(2) |
| S7 | $\alpha$ | P0 | 0.5126(1) | 0.3937(1)  | 0.5812(1) | 0.032(1) |
|    |          | P1 | 0.5104(5) | 0.3924(4)  | 0.5788(2) | 0.026(3) |
|    |          | P2 | 0.5102(5) | 0.3894(3)  | 0.5743(1) | 0.018(2) |
|    |          | P3 | 0.5092(6) | 0.3875(3)  | 0.5715(1) | 0.012(1) |
|    | $\beta$  | P4 | 0.5       | 0.4966(2)  | 0.7225(1) | 0.016(2) |
|    |          | P5 | 0.5       | 0.4956(2)  | 0.7239(2) | 0.021(1) |
|    |          | P6 | 0.5       | 0.4948(4)  | 0.7247(2) | 0.024(2) |
|    |          | P7 | 0.5       | 0.4941(4)  | 0.7256(2) | 0.021(2) |

---
